# Supplementary material
Source: PubMed Central journal article supplement (PMC4259979)
Supplement: mmc1.pdf [file mmc1.pdf]

The American Journal of Human Genetics, Volume 95

Supplemental Data

## **Genetic Association Analysis under Complex Survey**

### **Sampling: The Hispanic Community**

### **Health Study/Study of Latinos**

Dan-Yu Lin, Ran Tao, William D. Kalsbeek, Donglin Zeng, Franklyn Gonzalez II, Lindsay Fernández-Rhodes, Mariaelisa Graff, Gary G. Koch, Kari E. North, and Gerardo Heiss

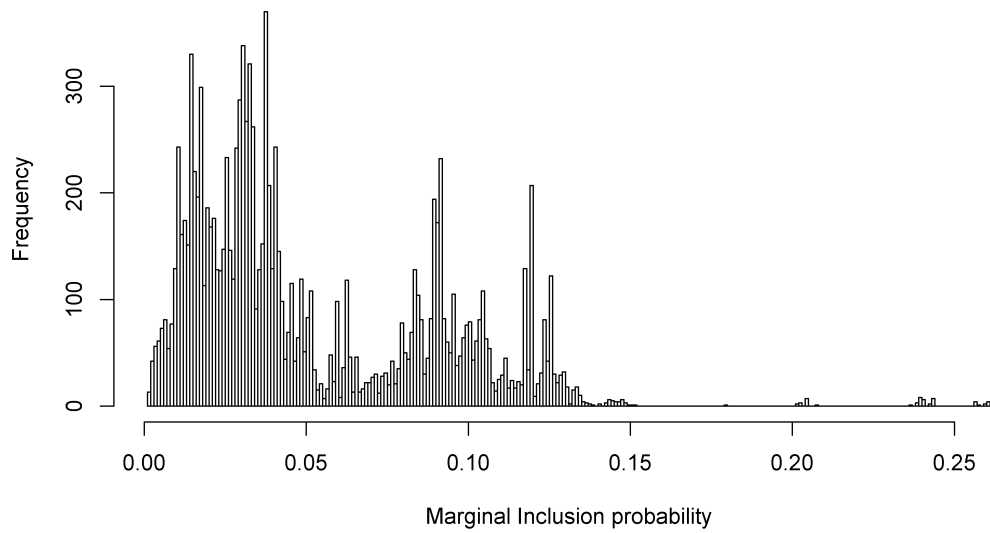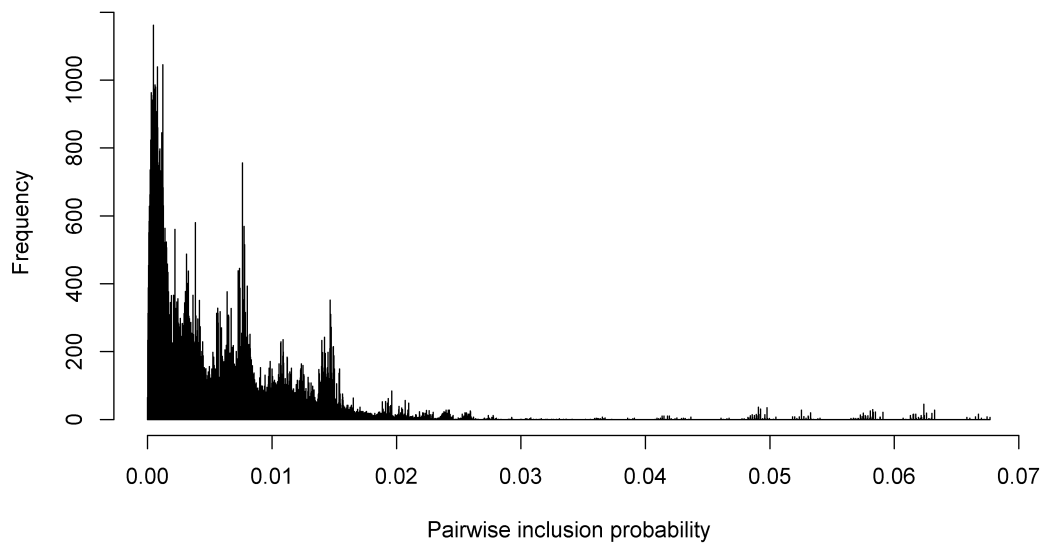

**Figure S1.** Marginal and pairwise inclusion probabilities in the HCHS/SOL.

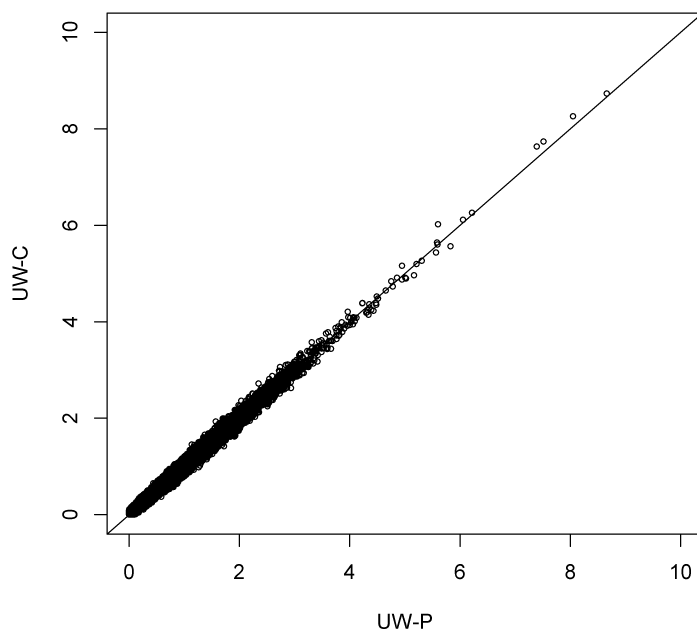

**Figure S2.** Plot of the  $-\log_{10}(p\text{-values})$  for the UW-C versus UW-P methods (with model-based variance estimators) from the genome-wide association analysis of BMI in the HCHS/SOL . The log-transformation was applied to BMI. SNPs with  $\text{MAF} < 1\%$  were excluded.

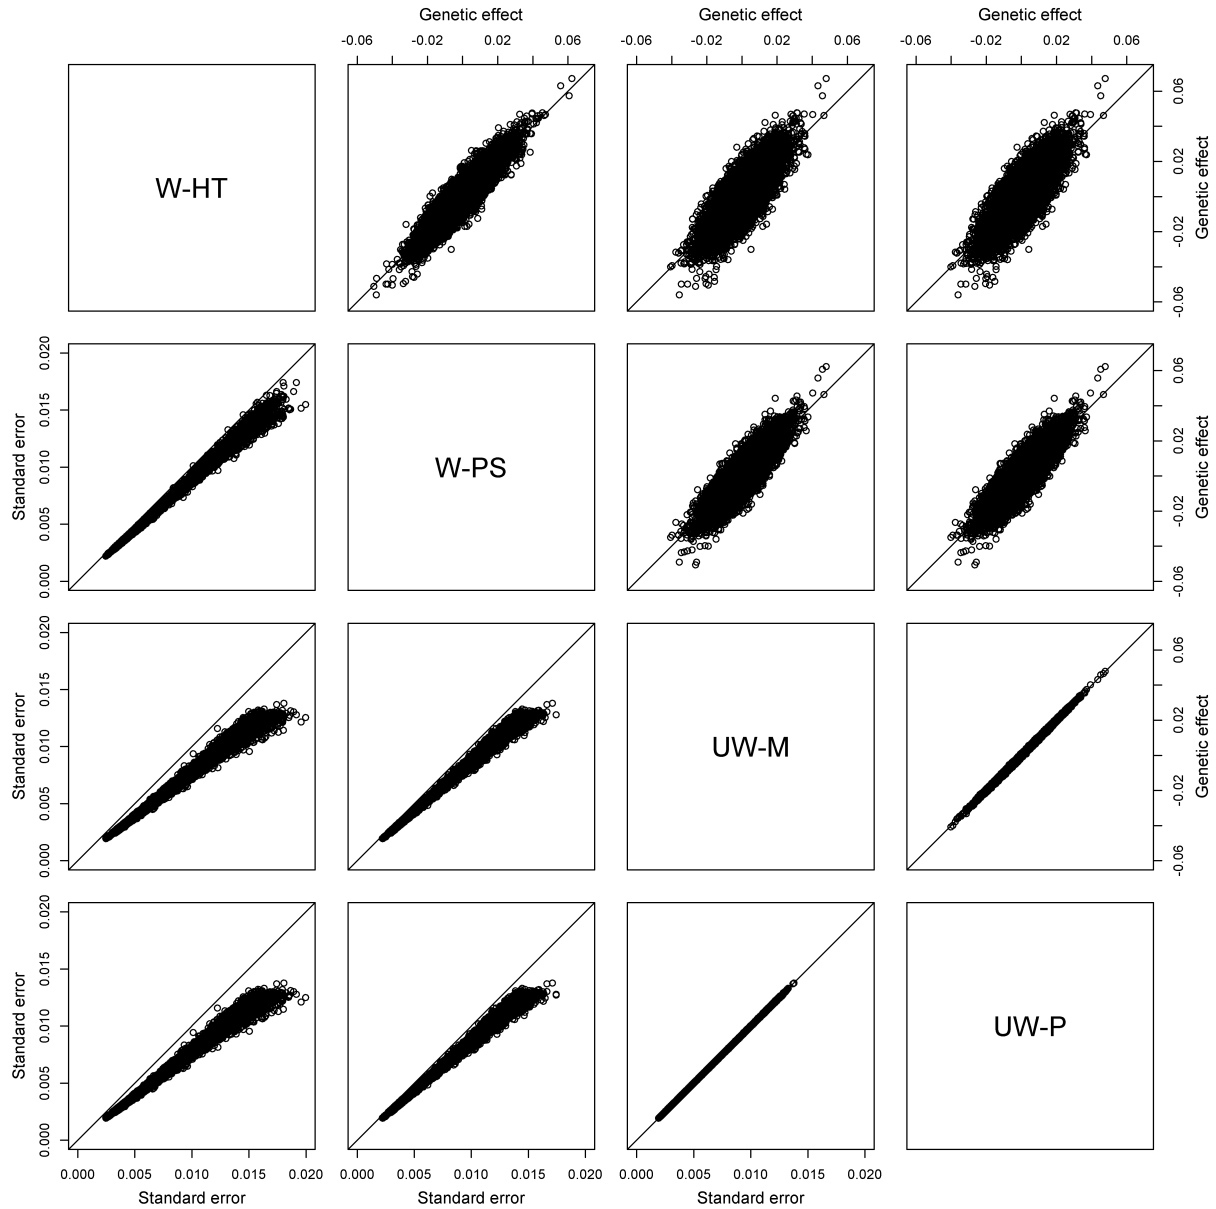

**Figure S3.** Effect estimates (upper right triangle) and standard error estimates (lower left triangle) from the genome-wide association analysis of BMI in the HCHS/SOL under weighted and unweighted methods with model-based variance estimators. The log-transformation was applied to BMI. SNPs with  $MAF < 1\%$  were excluded.

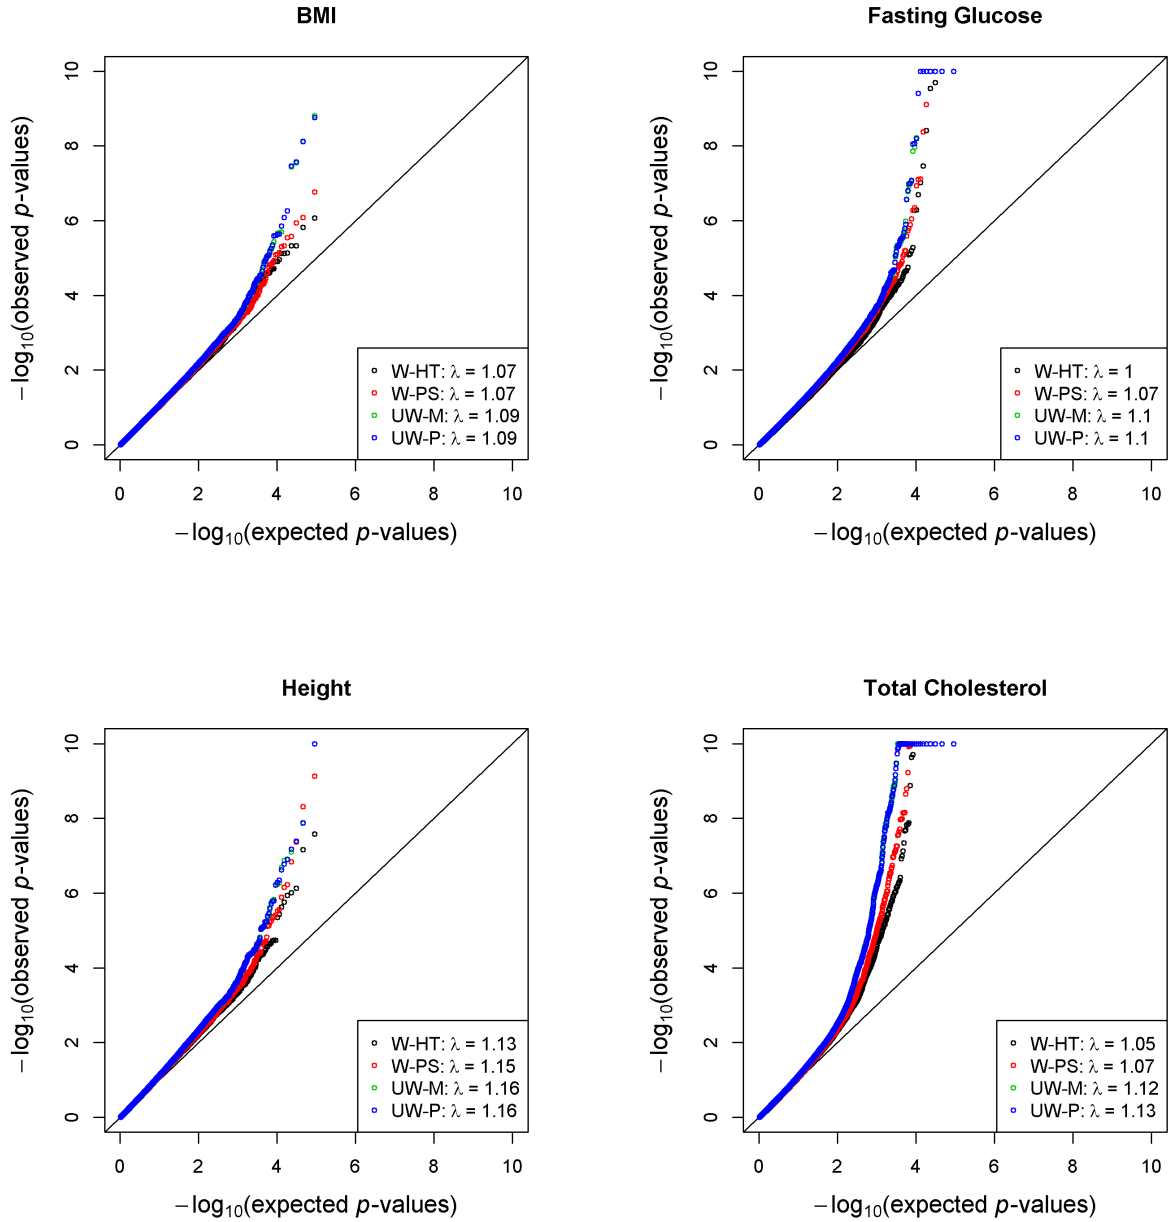

**Figure S4.** Quantile-quantile plots of  $-\log_{10}(p\text{-values})$  from the genome-wide association analysis of BMI, fasting glucose, height, and total cholesterol in the HCHS/SOL under weighted and unweighted methods with model-based variance estimators when the relatedness beyond the original households is disregarded. The log-transformation was applied to BMI and total cholesterol, and the inverse normal transformation was applied to fasting glucose. SNPs with  $\text{MAF} < 1\%$  were excluded. Most of the  $p$ -values are indistinguishable between UW-M and UW-P.

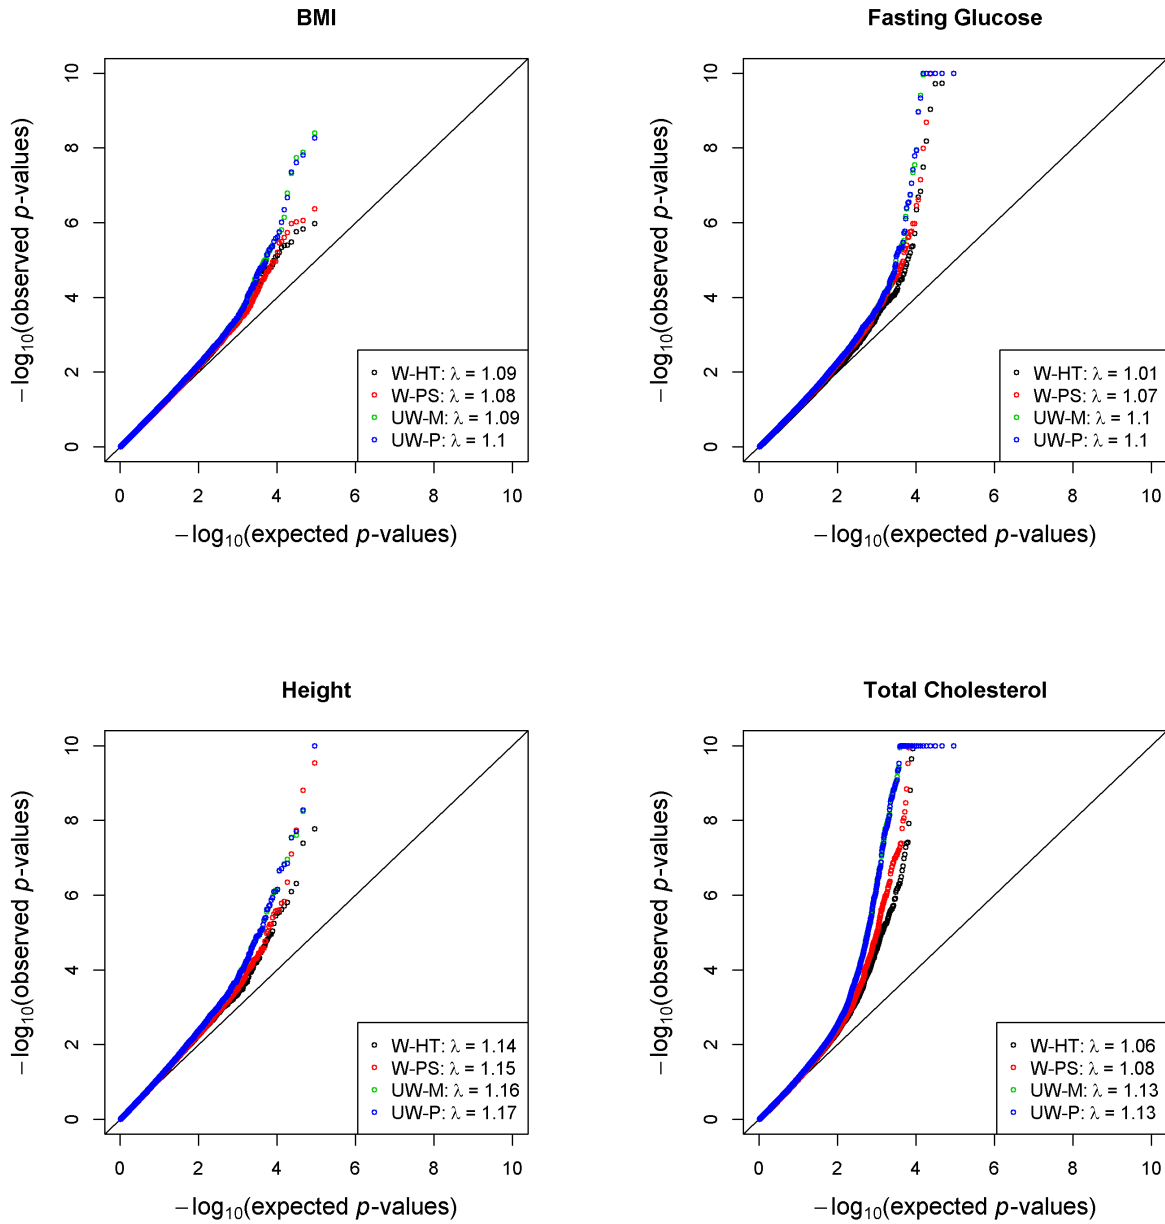

**Figure S5.** Quantile-quantile plots of  $-\log_{10}(p\text{-values})$  from the genome-wide association analysis of BMI, fasting glucose, height, and total cholesterol in the HCHS/SOL under weighted and unweighted methods with model-based variance estimators when the relatedness beyond BGs is disregarded. The log-transformation was applied to BMI and total cholesterol, and the inverse normal transformation was applied to fasting glucose. SNPs with  $\text{MAF} < 1\%$  were excluded. Most of the  $p$ -values are indistinguishable between UW-M and UW-P.
